# Supplementary material
Source: Springer Nature journal article supplement (https://www.springerprofessional.de/resource/supplementary/40702_2021_810_MOESM1_ESM.pdf/19940360)
Supplement: MOESM1 [file 19940360]

| Branche                                    | Cluster 1a                 | Cluster 1b   | Cluster 2    | Cluster 3    | Cluster 4    | Summe      |
|--------------------------------------------|----------------------------|--------------|--------------|--------------|--------------|------------|
| Antriebstechnik                            | 4<br>(11,43 <sup>a</sup> ) | 1<br>(5,56)  | 2<br>(9,09)  | 2<br>(14,29) | 1<br>(5,26)  | 10         |
| Bergbau-, Bau- und<br>Baustoffmaschinen    | 6<br>(17,14)               | 1<br>(5,56)  | 3<br>(13,64) | 2<br>(14,29) | 1<br>(5,26)  | 13         |
| Fördermittel                               | 2<br>(5,71)                | 3<br>(16,67) | -            | -            | -            | 5          |
| Hydraulische &<br>pneumatische Komponenten | 1<br>(2,86)                | -            | -            | -            | 1<br>(5,26)  | 2          |
| Kälte- und Lufttechnik                     | 2<br>(5,71)                | 1<br>(5,56)  | 1<br>(4,55)  | -            | -            | 4          |
| Landmaschinen                              | 1<br>(2,86)                | 2<br>(11,11) | 1<br>(4,55)  | -            | 1<br>(5,26)  | 5          |
| Maschinen für das<br>Papiergewerbe         | -                          | 1<br>(5,56)  | 1<br>(4,55)  | 1<br>(7,14)  | -            | 3          |
| Messtechnik                                | 2<br>(5,71)                | -            | -            | -            | -            | 2          |
| Metallerzeugung und<br>Walzwerkeinrichtung | -                          | -            | -            | -            | 1<br>(5,26)  | 1          |
| Mischkonzern                               | 4<br>(11,43)               | -            | 2<br>(9,09)  | 1<br>(7,14)  | 5<br>(26,32) | 12         |
| Nahrungsmittelmaschinen                    | -                          | 1<br>(5,56)  | 1<br>(4,55)  | 2<br>(14,29) | -            | 4          |
| Pumpen und Kompressoren                    | -                          | 1<br>(5,56)  | -            | 1<br>(7,14)  | -            | 2          |
| Textilmaschinen                            | -                          | -            | 1<br>(4,55)  | -            | -            | 1          |
| Verpackungsmaschinen                       | 1<br>(2,86)                | -            | -            | 1<br>(7,14)  | 1<br>(5,26)  | 3          |
| Werkzeugmaschinen                          | 9<br>(25,71)               | 7<br>(38,89) | 8<br>(36,36) | 2<br>(14,29) | 8<br>(42,11) | 34         |
| Sonstige                                   | 3<br>(8,58)                | -            | 2<br>(9,09)  | 2<br>(14,29) | -            | 7          |
| <b>Summe</b>                               | <b>35</b>                  | <b>18</b>    | <b>22</b>    | <b>14</b>    | <b>19</b>    | <b>108</b> |

<sup>a</sup>Anteil der Funktion innerhalb des Clusters in %
